# Supplementary material for: Biochar Is Not Durable for Remediation of Heavy Metal-Contaminated Soils Affected by Acid-Mine Drainage
Source: MDPI journal article supplement (doi:10.3390/toxics10080462), 2022-08-09
Supplement: s1 [file s1]

## Supplementary Information

### 1 Supplementary Table

**Table S1. Some major physicochemical characteristics of the biochar and soil used in the greenhouse experiment.**

| <b>Parameter</b>                          | <b>Biochar</b> | <b>Soil</b> |
|-------------------------------------------|----------------|-------------|
| <b>pH</b>                                 | 9.94           | 4.30        |
| <b>EC (dS/m)</b>                          | 8.050          | 0.723       |
| <b>BET surface area (m<sup>2</sup>/g)</b> | 37.85          |             |
| <b>Zeta potential (mv)</b>                | -60.9          |             |
| <b>Total organic C (g/kg)</b>             | 420            | 14.7        |
| <b>Total N (g/kg)</b>                     | 7.9            | 1.72        |
| <b>Total P (mg/kg)</b>                    | 2.35           |             |
| <b>Available P (mg/kg)</b>                | 59.23          | 0.018       |
| <b>Available K (g/kg)</b>                 | 9.65           | 0.023       |
| <b>Total Cr (mg/kg)</b>                   |                | 58.7        |
| <b>Total Ni (mg/kg)</b>                   |                | 15          |
| <b>Total Cu (mg/kg)</b>                   |                | 246         |
| <b>Total Zn (mg/kg)</b>                   |                | 256         |
| <b>Total Cd (mg/kg)</b>                   |                | 0.49        |
| <b>Total Pb (mg/kg)</b>                   |                | 171         |

## 2 Supplementary Figures

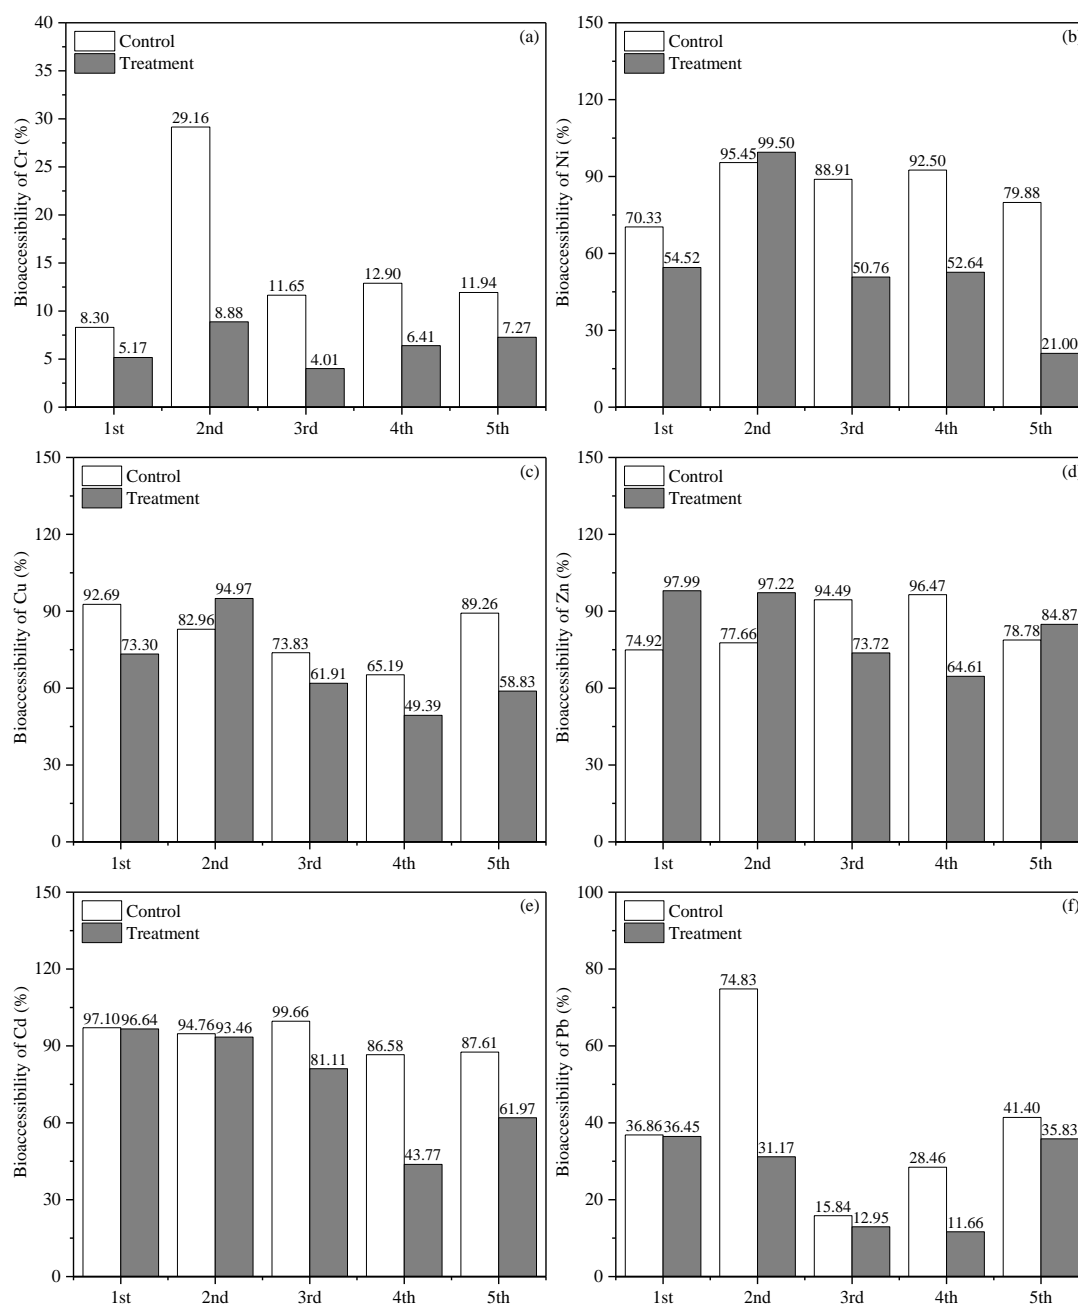

**Figure S1. Bioaccessibility (%) of Cr (a), Ni (b), Cu (c), Zn (d), Cd (e) and Pb (f) in the edible portion of the vegetable under simulated gastric conditions at different harvest times.**

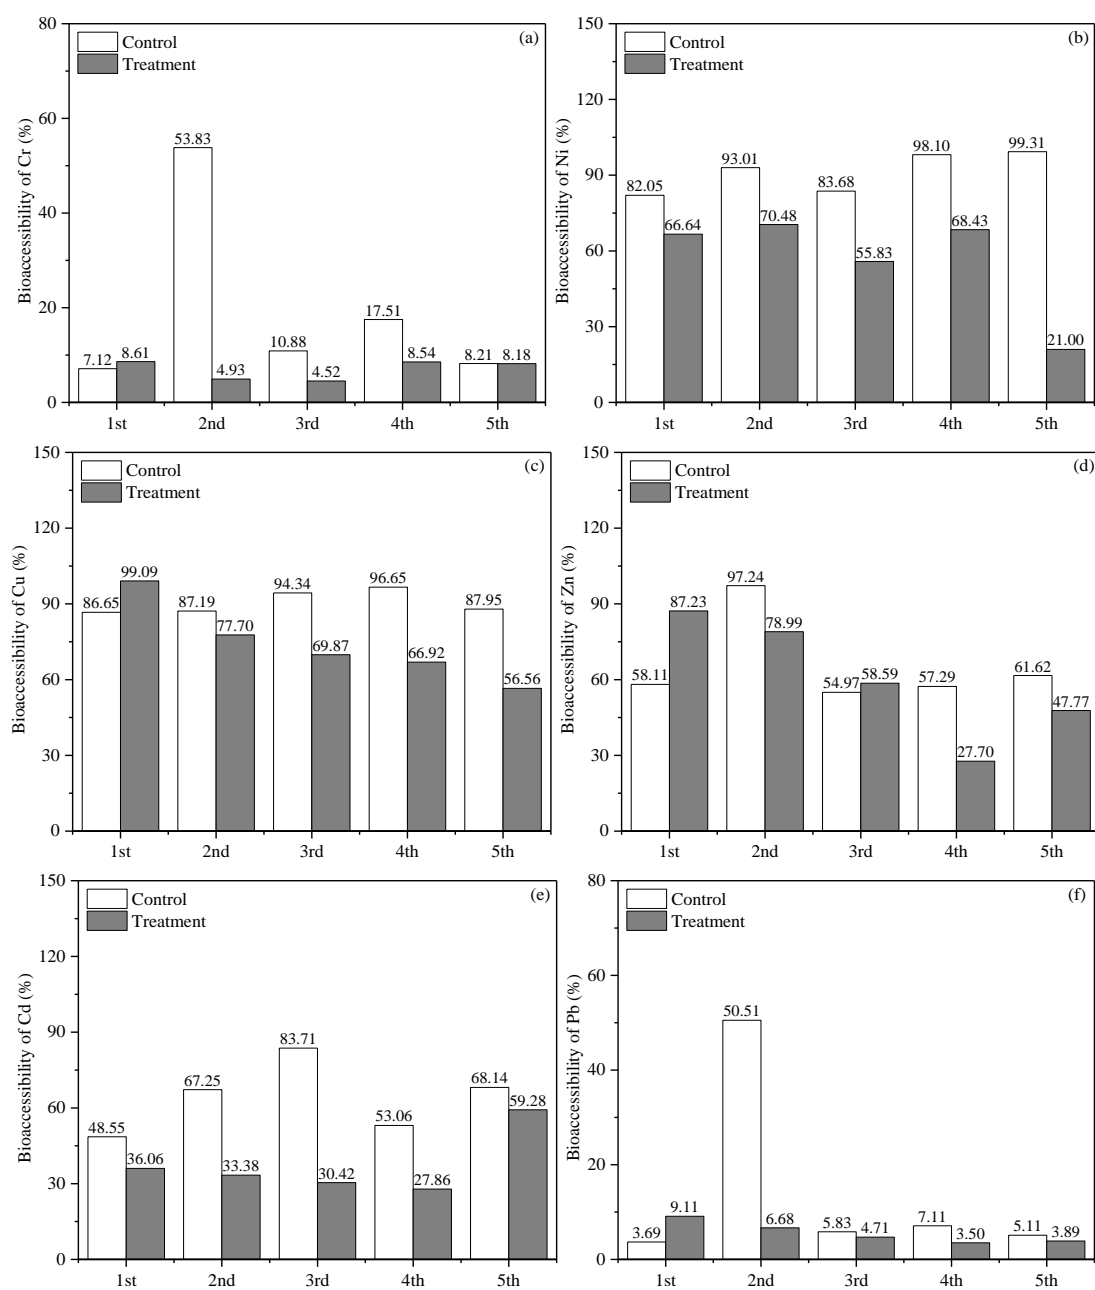

**Figure S2. Bioaccessibility (%) of Cr (a), Ni (b), Cu (c), Zn (d), Cd (e) and Pb (f) in the edible portion of the vegetable under simulated gastrointestinal conditions at different harvest times.**
